# Supplementary material for: Combination of Cancer Stem Cell Markers CD44 and CD24 Is Superior to ALDH1 as a Prognostic Indicator in Breast Cancer Patients with Distant Metastases
Source: PubMed Central journal article supplement (PMC5074575; doi:10.1371/journal.pone.0165253), 2016-10-21

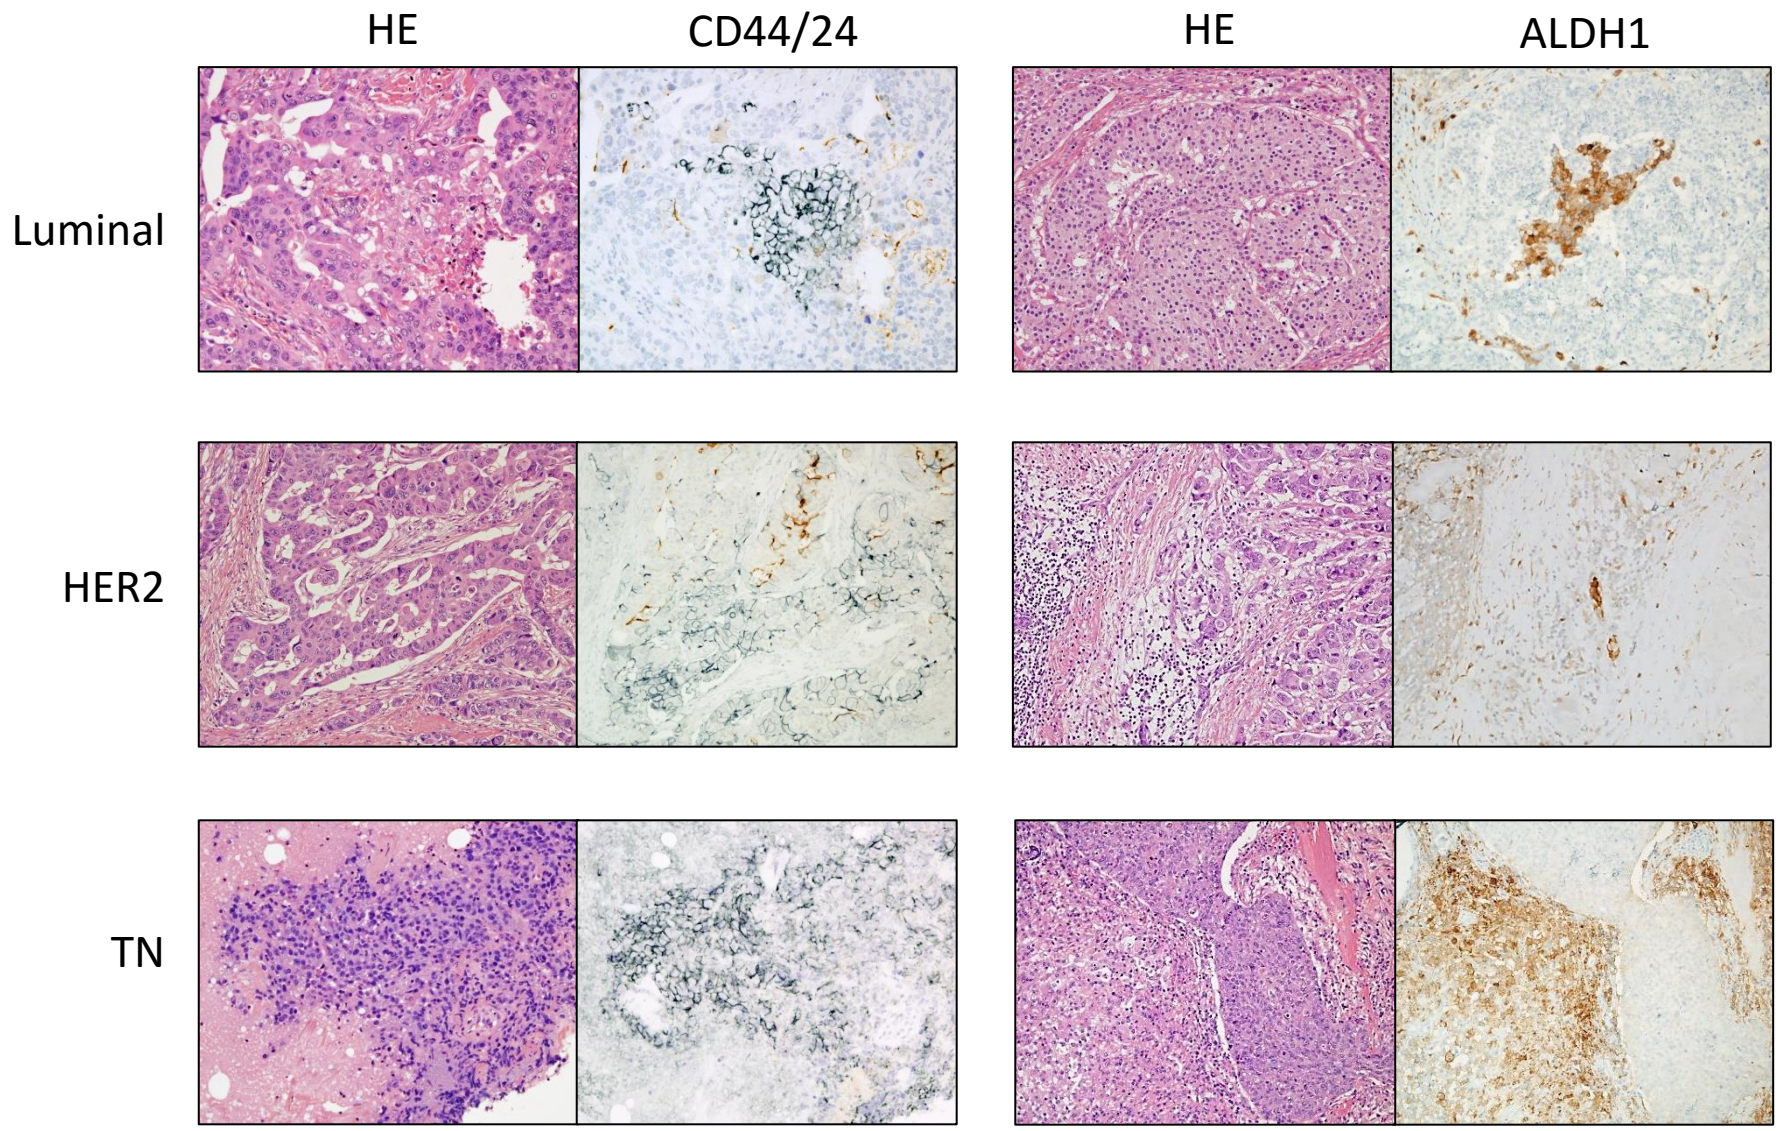

Supplement: pone.0165253.s002.pdf [file pone.0165253.s002.pdf]
